# **HB-EGF Signaling is Required for Glucose-Induced Pancreatic $\beta$ -Cell Proliferation in Rats**

Hasna Maachi<sup>1,2</sup>, Grace Fergusson<sup>1</sup>, Melanie Ethier<sup>1</sup>, Gabriel N. Brill<sup>3</sup>, Liora S. Katz<sup>3</sup>, Lee B. Honig<sup>3,5</sup>, Mallikarjuna R. Metukuri<sup>6</sup>, Donald K. Scott<sup>3</sup>, Julien Ghislain<sup>1</sup>, Vincent Poitout<sup>1,4</sup>

<sup>1</sup> Montreal Diabetes Research Center, CRCHUM, Montreal, QC, Canada

<sup>2</sup> Department of Pharmacology and Physiology, University of Montreal, QC, Canada

<sup>3</sup> Diabetes, Obesity, and Metabolism Institute, Icahn School of Medicine at Mount Sinai, New York, NY, USA

<sup>4</sup> Department of Medicine, University of Montreal, QC, Canada

<sup>5</sup> Current address R&Q Solutions, Cincinnati, OH, USA

<sup>6</sup> Current address, Syneos Health, Morrisville, NC, USA

Running title: Glucose-HB-EGF axis promotes  $\beta$ -cell proliferation

Corresponding author:

Vincent Poitout, DVM, PhD

CRCHUM, 900 rue St Denis

Montréal, QC, H2X 0A9 - CANADA

Tel: (514) 890-8044

Email: [vincent.poitout@umontreal.ca](mailto:vincent.poitout@umontreal.ca)

Word count: Abstract, 196; Main text, 3788

7 figures and 4 supplemental figures and tables

## ABBREVIATIONS

|        |                                                            |
|--------|------------------------------------------------------------|
| 3C     | Chromosome conformation capture                            |
| BTC    | betacellulin                                               |
| ChIP   | Chromatin immunoprecipitation                              |
| ChREBP | Carbohydrate response element binding protein              |
| EGF    | Epidermal growth factor                                    |
| EGFR   | Epidermal growth factor receptor                           |
| FACS   | Fluorescent activated cell sorting                         |
| GIR    | Glucose infusion rate                                      |
| HB-EGF | Heparin-binding epidermal growth factor-like growth factor |
| mTORC1 | Mammalian target of rapamycin complex 1                    |
| TSS    | Transcriptional start site                                 |



## ABSTRACT

The molecular mechanisms of  $\beta$ -cell compensation to metabolic stress are poorly understood. Previously we observed that nutrient-induced  $\beta$ -cell proliferation in rats is dependent on epidermal growth factor receptor (EGFR) signaling. The aim of this study was to determine the role of the EGFR ligand heparin-binding epidermal growth factor-like growth factor (HB-EGF) in the  $\beta$ -cell proliferative response to glucose, a  $\beta$ -cell mitogen and key regulator of  $\beta$ -cell mass in response to increased insulin demand. We show that exposure of isolated rat islets to HB-EGF stimulated  $\beta$ -cell proliferation, whereas inhibition of EGFR or HB-EGF blocked the proliferative response not only to HB-EGF but also to glucose. Furthermore, knockdown of HB-EGF in islets blocked  $\beta$ -cell proliferation in response to glucose ex vivo and in vivo in transplanted glucose-infused rats. Mechanistically, we demonstrate that HB-EGF mRNA levels were increased in  $\beta$  cells in response to glucose in a carbohydrate response element binding protein (ChREBP)-dependent manner. In addition, chromatin-immunoprecipitation studies identified ChREBP binding sites in proximity to the HB-EGF gene. Finally, inhibition of Src family kinases, known to be involved in HB-EGF processing, abrogated glucose-induced  $\beta$ -cell proliferation. Our findings identify a novel glucose/HB-EGF/EGFR axis implicated in  $\beta$ -cell compensation to increased metabolic demand.

## INTRODUCTION

In obesity, the maintenance of glucose homeostasis is critically dependent on the capacity of the pancreatic  $\beta$  cell to meet the increased insulin requirements that arise due to insulin resistance. Failure of this mechanism leads to type 2 diabetes (1). Hence, understanding how the  $\beta$  cell compensates for insulin resistance is a critical prerequisite to defining the pathogenesis of type 2 diabetes.

B-cell compensation involves both an increase in the capacity to secrete insulin and an increase in mass. In adult rodents,  $\beta$ -cell expansion arises primarily from the replication of existing  $\beta$  cells (2; 3). Over the last decade, modelling metabolic stress in rodents has led to the identification of an array of factors including insulin receptors (4), neurotransmitters (5), epidermal growth factor receptors (EGFR) (6), serpinB1 (7) and nutrients (8) that control  $\beta$ -cell proliferation. Prominent among these factors, glucose controls  $\beta$ -cell replication in both rodent (9-12) and human (13) islets. Glucose-induced  $\beta$ -cell proliferation requires glucokinase (10; 11), the enzyme catalyzing the first committed step in glucose metabolism. Although ATP-sensitive potassium channel closure and membrane depolarisation are also involved (11), the mitogenic effects of glucose appear to be independent of insulin receptor signaling (12). Instead, evidence supports a role of Insulin Receptor Substrate 2 (IRS2), Mammalian Target of Rapamycin (mTOR) (12) and the Carbohydrate-responsive element-binding protein (ChREBP) isoforms  $\alpha/\beta$  (14; 15). ChREBP is a glucose sensing transcription factor that binds DNA with its partner, Mlx, at carbohydrate response elements to stimulate glucose-responsive genes (16). Despite this progress, the precise mechanisms underlying glucose-induced  $\beta$ -cell proliferation remains debated.

We established an *in vivo* model of nutrient excess in rats, in which a 72-h co-infusion of glucose and a lipid emulsion triggers a marked increase in  $\beta$ -cell proliferation and mass (17). Subsequent studies identified a signaling cascade involving the EGFR-mTOR-FoxM1 that underlies the  $\beta$ -cell response to nutrient infusion (18). In support of these finding, EGFR loss-of-function prevents compensatory  $\beta$ -cell mass expansion in adult rodents under conditions of physiological (pregnancy) and pathophysiological (high fat feeding) insulin resistance (6) as well as following partial pancreatectomy (19). However, the identity of the EGFR ligand mediating this effect remains unknown. In previous studies we discovered that expression of the heparin-binding epidermal growth factor (EGF)-like growth factor (HB-EGF) is up-regulated in islets from nutrient-infused rats, and that exogenous HB-EGF stimulates replication of MIN6 cells and primary rat  $\beta$  cells (18). HB-EGF is a member of the EGF family synthesized as a membrane-anchored precursor that can be processed by the action of a disintegrins and metalloproteinases (ADAM) to release the soluble active form (20). HB-EGF induces phosphorylation of EGFR and subsequent activation of a downstream signaling cascade including MAPK and PI3K/AKT.

The aim of this study was 1) to determine the role of HB-EGF in the  $\beta$ -cell proliferative response to glucose in rat islets *ex vivo* and *in vivo* and 2) to investigate the mechanisms linking glucose to an HB-EGF/EGFR signaling pathway promoting  $\beta$ -cell proliferation.

## **RESEARCH DESIGN AND METHODS**

### **Reagents and solutions**

RPMI-1640 and qualified FBS were from Invitrogen (Carlsbad, CA). Recombinant HB-EGF and betacellulin (BTC) were from R&D Systems (Minneapolis, MN). The HB-EGF inhibitor, CRM197, and the Src family kinase inhibitor, PP1, were from Sigma-Aldrich (St. Louis, MO). The EGFR tyrosine kinase inhibitor AG1478 and the mammalian target of rapamycin complex 1 (mTORC1) inhibitor rapamycin were from LC Laboratories (Woburn, MA). Adenoviruses expressing shRNAs against HB-EGF (AdV-shHB-EGF) and control scrambled shRNA (AdV-shCTL) were from Vector Biolabs (Malvern, PA). SmartPool small interfering RNA (siRNA) duplexes against rat ChREBP and control siRNA were obtained from Dharmacon (Lafayette, CO).

### **Islet isolation and adenoviral infection of islets**

Islets were isolated from 2-month-old male Wistar or Lewis rats (Charles River, Saint-Constant, QC, Canada) by collagenase digestion and dextran density gradient centrifugation as described (21). For adenoviral infections, isolated islets were partially dissociated and then infected with 100 plaque-forming units (pfu) of adenoviruses/cell overnight as described (22), after which the medium was replaced with complete medium and cultured for an additional 24 h prior to stimulation *ex vivo* or transplantation.

### **Ex vivo islet proliferation**

Isolated islets were cultured in RPMI-1640 with 10% (vol./vol.) qualified FBS (complete medium) for 72 h in the presence of glucose, 100 ng/ml HB-EGF or 50 ng/ml BTC as indicated in the Figure legends. EdU (10  $\mu$ M) was added as indicated. The media were changed every 24 h. At the end of treatment, islets were embedded in optimal cutting temperature (OCT) compound, frozen,

sectioned at 8  $\mu$ m and mounted on Superfrost Plus slides (Life Technologies Inc., Burlington, ON, Canada). Sections were immunostained for insulin (INS) or Nkx6.1 and the proliferative marker Ki67 or EdU using the Click-iT™ EdU Imaging Kit (Life Technologies Inc.). Primary antibodies and dilutions are listed in Supplemental Table S1. Secondary antibodies were from Jackson ImmunoResearch (West Grove, PA). Images were taken with a fluorescence microscope (Zeiss, Thornwood, NY). Proliferation was calculated as the percentage of double-positive Ki67+ (or EdU+) and INS+ (or Nkx6.1+) cells over the total INS+ (or Nkx6.1+) population. At least 1500  $\beta$  cells from 7-17 individual islets were manually counted per condition.

### **Ex vivo islet insulin secretion and content**

Triplicate batches of ten islets each were sequentially incubated twice with KRB solution containing 0.1% (wt/vol.) BSA and 2.8 mM glucose for 20 min at 37 °C, then incubated for 1 h with 2.8 or 16.7 mM glucose. Intracellular insulin content was measured following acid–alcohol extraction. Insulin was measured by radioimmunoassay using a rat insulin RIA kit (Millipore, Billerica, MA).

### **Islet transplantation and glucose infusion in rats**

All procedures were approved by the Institutional Committee for the Protection of Animals at the Centre Hospitalier de l'Université de Montréal. Male Lewis rats weighing 250–350 g (~2-month-old) (Charles River) underwent catheterization of the jugular vein for infusion and the carotid artery for sampling as described (23). For islet transplantation, 500 islets isolated from 2-month-old male Lewis rats were infected with AdV-shHB-EGF or AdV-shCTL, as described above, and injected via a cannula under the left kidney capsule during the catheterization surgery. Animals were allowed to recover for 72 h followed by intravenous infusions of either saline (Sal) (0.9%

wt/vol. NaCl; Baxter, Mississauga, ON, Canada) or 70% (wt/vol.) glucose (Glu) (McKesson, Montreal, QC, Canada) for an additional 72 h. The glucose infusion rate (GIR) was adjusted to maintain plasma glucose at 13.9–19.4 mmol/l throughout the 72 h infusion.

### **Immunostaining of tissue sections**

Transplanted kidneys and pancreata were fixed for 4 h in 4% paraformaldehyde and cryoprotected overnight in 30% sucrose. Tissues were then embedded in OCT, frozen, sectioned at 8  $\mu$ m and mounted on Superfrost Plus slides (Life Technologies Inc.). Antigen retrieval was performed using sodium citrate buffer and  $\beta$ -cell proliferation was assessed as described above.

### **Flow cytometric sorting of $\beta$ -cells**

Islets were isolated from male RIP7-RLuc-YFP transgenic rats (24), washed in PBS and dispersed in accutase (Innovative Cell Technologies, Inc., San Diego, CA) for 10 min at 37°C. At the end of the digestion, cells were washed, resuspended in PBS, and passed through a 40- $\mu$ m filter prior to sorting. Flow cytometric sorting of YFP-positive and -negative cells was carried out using a FACSaria II flow cytometer with FACSDiva software (BD Biosciences, San Jose, CA). YFP-expressing cells were detected using the 488-nm laser and 530/30-nm BP filter.

### **Quantitative RT-PCR**

Total RNA was extracted from 150-200 whole islets or 100,000 sorted islet cells using the RNeasy micro kit (Qiagen, Valencia, CA). RNA was quantified by spectrophotometry using a NanoDrop 2000 (Life Technologies Inc.) and 1  $\mu$ g of RNA was reverse transcribed. Real-time PCR was performed by using QuantiTect SYBR Green PCR kit (Qiagen). Results were normalized to cyclophilin A RNA levels.

### **Chromatin immunoprecipitation (ChIP) and chromatin confirmation capture (3C)**

INS1 832/13 cell culture, siRNA treatment and RNA isolation and RT-PCR were performed as described (14). ChIP was performed as previously described (15). Briefly, INS-1 cells were cultured for 16 h in 2 mM glucose followed by 6 h at 2 or 20 mM glucose. An anti-ChREBP or normal rabbit IgG were used for immunoprecipitation and a genomic region 30 kb downstream from the transcription start site of the HB-EGF gene known to bind ChREBP (25) was amplified by RT-PCR. Primary antibodies are listed in Supplemental Table S1. 3C was performed essentially as described in (26). INS-1 cells were treated as for ChIP. The sequences of the primers used for RT-PCR, ChIP and 3C are shown in Supplemental Table S2.

### **Immunoblotting**

Proteins were extracted from INS-1 cells and subjected to 10% SDS-PAGE, transferred to nitrocellulose membranes, and immunoblotted with primary antibodies against phospho-EGFR, phospho-S6 ribosomal protein and  $\alpha$ -tubulin in 5% (wt/vol) milk. Primary antibodies and dilutions are listed in Supplemental Table S1. Signals were revealed using horseradish peroxidase–conjugated anti-rabbit IgG secondary antibodies (Bio-Rad, Richmond, CA) in 5% (wt/vol) milk and visualized using Western Lighting Plus-ECL (Perkin Elmer Inc., Waltham, MA). Band intensity was quantified using ImageJ software (National Institutes of Health).

### **Statistical analyses**

Data are expressed as mean  $\pm$  SEM. Significance was tested using one-way ANOVA with Tukey or Dunnett post hoc test, or two-way ANOVA with post hoc adjustment for multiple comparisons, as appropriate, using GraphPad InStat (GraphPad Software, San Diego, CA).  $P < 0.05$  was considered significant.

## RESULTS

### **HB-EGF induces $\beta$ -cell proliferation via EGFR-mTOR signaling.**

We previously showed that HB-EGF stimulates  $\beta$ -cell proliferation in dispersed rat islets (18). To confirm and extend these findings, we assessed the  $\beta$ -cell proliferative response to HB-EGF in intact rat islets using either Ki67 or EdU-labeling to mark proliferating cells and insulin or Nkx6.1 to mark  $\beta$  cells (Fig. 1). In the presence of 2.8 mM glucose, HB-EGF and BTC increased the percentage of Ki67-positive  $\beta$  cells to levels comparable to those detected in response to 16.7 mM glucose (Fig. 1A-D). Similar results were obtained when using EdU as a proliferative marker (Fig. 1E&F). Exposing islets to the EGFR tyrosine kinase inhibitor AG1478 or the mTORC1 inhibitor rapamycin abrogated HB-EGF induced  $\beta$ -cell proliferation (Fig. 1G&H). We then asked whether HB-EGF affects insulin secretion. Neither acute (1 h) nor chronic (24 h) exposure to HB-EGF affected insulin secretion or insulin content, although glucose-stimulated insulin secretion as a percentage of insulin content was slightly reduced following chronic HB-EGF treatment (Supplemental Fig. S1). These results show that exogenous HB-EGF promotes rat  $\beta$ -cell proliferation via EGFR and mTOR without significantly affecting insulin secretion.

### **Glucose-induced $\beta$ -cell proliferation in isolated rat islets requires HB-EGF/EGFR signaling.**

Given that glucose is a rodent beta-cell mitogen (9-12), we next examined the contribution of EGFR signaling to glucose-induced  $\beta$ -cell proliferation. Treatment of islets for 72 h with 16.7 mM glucose led to an approximately 3-fold increase in Ki67 staining compared to 2.8 mM glucose (Fig. 2A&B). Addition of AG1478 completely prevented the glucose-induced increase in  $\beta$ -cell proliferation (Fig. 2A&B). Similarly, addition of the HB-EGF inhibitor CRM197 (Fig. 2C&D) or adenoviral-mediated HB-EGF knockdown (Fig. 2E&F) blocked the stimulatory effect of glucose



on  $\beta$ -cell proliferation. These results show that HB-EGF/EGFR signaling is required for glucose-induced  $\beta$ -cell proliferation in isolated rat islets.

### **Glucose-induced $\beta$ -cell proliferation in transplanted islets requires HB-EGF.**

To test whether islet-derived HB-EGF is necessary for glucose-induced  $\beta$ -cell proliferation in vivo, Lewis rats were transplanted under the kidney capsule with islets infected with either Adv-shHBEGF or Adv-shCTL, and infused with Sal or Glu for 72 h (Fig. 3A). Average blood glucose levels and glucose infusion rates were not significantly different between both groups (Supplemental Fig. S2). As expected, glucose infusion increased the percentage of Ki67-positive  $\beta$  cells in the endogenous pancreas to the same extent in Adv-shCTL and Adv-shHBEGF transplant recipients (Fig. 3B&C). Adv-shCTL-infected islet grafts showed increased  $\beta$ -cell proliferation in response to glucose infusion (Fig. 3D&E). In contrast, Adv-shHBEGF-infected islets were unresponsive to the mitogenic effects of glucose (Fig. 3D&E). These data demonstrate that, as observed in isolated islets (Fig. 2), HB-EGF/EGFR signaling is required for glucose-induced  $\beta$ -cell proliferation in vivo.

### **HB-EGF gene expression is up-regulated in $\beta$ cells in response to glucose.**

As we previously showed that infusion of glucose and lipids in rats increases HB-EGF mRNA levels in islets (18), we asked whether glucose alone was sufficient to stimulate HB-EGF expression in isolated islets. Indeed, 2-month-old rat islets exposed to 16.7 mM glucose for 24 h displayed a 1.5-fold increase of HB-EGF mRNA in comparison to 2.8 mM glucose (Fig. 4A). To determine whether the increase in islet HB-EGF gene expression was primarily in  $\beta$  cells, we made use of a transgenic rat expressing yellow fluorescent protein (YFP) under the control of the Ins2 promoter (RIP7-RLuc-YFP) (24) to enrich for  $\beta$  cells by flow cytometry after glucose treatment.

Interestingly, glucose augmented HB-EGF mRNA levels in the YFP-positive ( $\beta$ -cell enriched; Fig. 4B), but not the YFP-negative (Fig. 4C), fraction. We conclude that glucose stimulates HB-EGF gene expression in rat  $\beta$  cells.

### **Glucose stimulates HB-EGF gene expression via ChREBP.**

ChREBP is a key mediator of glucose-induced transcriptional changes (25). Therefore, we asked whether HB-EGF is a direct target of ChREBP. Consistent with the results shown in Fig. 4, glucose increased HB-EGF expression in untransfected INS-1 cells and in cells transfected with a control siRNA (Fig. 5A). In contrast, siRNA-mediated knockdown of ChREBP abolished the glucose response (Fig. 5A). ChREBP ChIP-seq and DNase-seq analyses of INS-1 cells exposed to glucose identified putative enhancer elements containing canonical ChREBP binding sites located approximately 30 kb downstream of the HB-EGF transcriptional start site (TSS) (25). ChIP analysis for one of these elements showed that a 6 h exposure to 20 mM glucose significantly increased ChREBP binding, whereas binding to a control region was unchanged (Fig. 5B). Furthermore, 3C analysis revealed increased interactions between these enhancers and the HB-EGF promoter in the presence of 20 mM glucose (Fig. 5C). These results strongly suggest that glucose-induced HB-EGF gene expression is mediated by direct binding of ChREBP to enhancers located 3' to the HB-EGF gene.

### **Glucose-induced $\beta$ -cell proliferation is dependent on Src upstream of EGFR activation, but glucose-induced mTOR activation does not require HB-EGF.**

Processing of proHB-EGF by ADAM proteins releases the active form that binds and activates EGFR (20). Previous studies in mesangial cells suggest that glucose-induced proteolytic processing of HB-EGF requires Src activation (27). Therefore, we investigated the role of Src

family kinases in glucose-induced  $\beta$ -cell proliferation. Addition of the Src inhibitor PP1 abrogated the  $\beta$ -cell proliferative response to 16.7 mM glucose but not to HB-EGF (Fig. 6A&B), consistent with the possibility that glucose promotes proHB-EGF cleavage via Src followed by HB-EGF activation of EGFR.

Previous studies showed that glucose-induced  $\beta$ -cell proliferation is dependent on mTOR activation (28). As the mitogenic effect of HB-EGF was also dependent on mTOR in rat islets (Fig. 1G&H), we asked whether mTOR activation by glucose is dependent on HB-EGF. Exposing islets for 24 and 48 h to 16.7 mM glucose led to a significant increase in phosphorylation of the mTOR substrate S6 ribosomal protein (S6RP) (Fig. 6C&D). However, at these time points HB-EGF did not increase S6RP phosphorylation, and blocking HB-EGF with CRM197 did not affect glucose-induced mTOR activation ((Fig. 6C&D). Hence, glucose-induced mTOR activation is independent of HB-EGF.

## DISCUSSION

The results of this study demonstrate a critical role for HB-EGF in glucose-induced  $\beta$ -cell proliferation in rat  $\beta$  cells. Exposing isolated islets to exogenous HB-EGF induced  $\beta$ -cell proliferation, whereas blocking HB-EGF signaling by inhibiting either EGFR or HB-EGF completely prevented the proliferative response. In vivo, silencing HB-EGF prevented the increase in  $\beta$ -cell proliferation in islets transplanted under the kidney capsule of glucose-infused rats. Taken together, these results reveal that a glucose/HB-EGF/EGFR axis controls  $\beta$ -cell proliferation. Mechanistically, we showed that HB-EGF gene expression was induced by glucose in the  $\beta$  cell through the action of ChREBP. In addition we found that glucose-, but not HB-EGF-induced  $\beta$ -cell proliferation is blocked by Src inhibition. As Src family kinases are involved in EGFR transactivation via ADAM metalloproteases, we propose a mechanism whereby glucose activates ChREBP and Src to promote HB-EGF gene expression and HB-EGF membrane shedding, respectively, and subsequently EGFR downstream signaling and cell cycle activation (Fig. 7).

Our previous (18) and current results are in agreement with studies showing that overexpression of HB-EGF by retrograde injection of adenoviruses into the pancreatic duct leads to proliferation of pre-existing  $\beta$ -cells in adult mice (29). In contrast, an increase in  $\beta$ -cell proliferation was not described following precocious HB-EGF expression in developing mouse  $\beta$  cells (30). However, the presence of pancreatic fibrosis, stromal expansion and islet dysfunction in this model may have precluded such an effect. Interestingly, overexpression of HB-EGF (29) or BTC (31) in pancreatic ducts promotes  $\beta$ -cell neogenesis, and EGF gain-of-function studies in human duct cells (32; 33) support a similar conclusion. Hence, we propose that the major effect of HB-EGF is to promote proliferation of existing  $\beta$  cells in rat islets ex vivo and in vivo but that  $\beta$ -cell neogenesis from

exocrine tissue could also contribute to the overall beneficial effects of HB-EGF on  $\beta$ -cell mass. In contrast to its effects on  $\beta$ -cell proliferation, acute and extended (24 h) exposure to HB-EGF did not alter insulin secretion or insulin content in rat islets *ex vivo*. However, positive, anti-diabetic, effects of HB-EGF on the  $\beta$  cell were demonstrated in multiple low-dose streptozotocin diabetic mice whereby combined treatment of gastrin and HB-EGF led to improved glucose tolerance and islet function due in part to a reduction in insulinitis (34). Further studies will be required to fully elucidate the pleotropic effects of HB-EGF on pancreatic islets.

We found that AG1478, a specific inhibitor of EGFR with minimal activity towards other ErbB isoforms, completely abrogates HB-EGF induced  $\beta$ -cell proliferation. As HB-EGF signals via EGFR (ErbB1) and ErbB4 but not ErbB2 or ErbB3 (35) and EGFR is expressed in  $\beta$ -cells, whereas ErbB4 is only weakly expressed in rodent islets (36), we propose that HB-EGF acts predominantly via EGFR to promote  $\beta$ -cell proliferation.

EGFR inhibition, loss-of-function and dominant negative studies in adult rodents in the context of pathophysiological and physiological metabolic stress (6; 18; 37), and partial pancreatectomy (19) all suggest that  $\beta$ -cell EGFR underlies the maintenance of glucose homeostasis by transducing signals that increase  $\beta$ -cell proliferation and mass. Notwithstanding a role for BTC downstream of GLP-1 (38), however, attempts to investigate the role of EGFR ligands in the regulation of  $\beta$ -cell mass and function have been limited to gain-of-function approaches (29; 31; 39; 40), whereas the identification of endogenous ligands contributing to  $\beta$ -cell compensation have until now not been addressed. We found that glucose, a natural  $\beta$ -cell mitogen and key effector of regulation of  $\beta$ -cell mass in the face of increased insulin demand (11), requires HB-EGF signaling. When rat islets were exposed to glucose *ex vivo* or *in vivo*, the  $\beta$ -cell mitogenic response was dependent on both

EGFR and HB-EGF. Although HB-EGF was essential for the glucose response, whether HB-EGF is the sole endogenous EGFR ligand acting during  $\beta$ -cell compensation to metabolic stress remains an open question. BTC (39), epiregulin (EPGN) (41), TGF $\alpha$  and EGF (39; 42) exert mitogenic effects on the  $\beta$  cell and are expressed in developing (43) and adult (36) rodent islets and during  $\beta$ -cell neogenesis (44). Hence, different EGFR ligands likely contribute to  $\beta$ -cell compensation in a context-dependent manner.

In previous studies we showed that HB-EGF gene expression is upregulated in islets following nutrient-infusion in rats (18) and a similar trend was found in obese, diabetes-resistant (B6) mice (45). Our present results suggest that the increase in HB-EGF gene expression is due, at least in part, to the direct action of glucose and are consistent with the time- and dose-dependent increase in HB-EGF gene expression observed in response to glucose in INS-1 cells (25) and rat islets (46). In addition we found that ChREBP is necessary for HB-EGF gene expression and that ChREBP binds a 3' HB-EGF gene enhancer element. Primary targets of ChREBP in the  $\beta$ -cell include ROR $\gamma$  and Myc (25), whereas the cell cycle regulatory cyclins and cyclin dependent kinases (cdks), which lack ChREBP binding sites, respond to glucose in a delayed manner due to their dependency on first-phase factors (14; 25). Hence, downstream of ChREBP, HB-EGF/EGFR signaling could play a role alongside first-phase transcription factors to drive cell cycle regulators and initiate  $\beta$ -cell cycle progression in response to glucose (Fig. 7).

Although membrane anchored proHB-EGF may be involved in juxtacrine signaling (47), the major effects of HB-EGF in the  $\beta$  cell are likely mediated by the soluble form generated by proteolytic processing of proHB-EGF. In mesangial cells, glucose promotes HB-EGF shedding and EGFR transactivation through Src-dependent activation of metalloproteases (27). Our results showing that Src inhibition blocked glucose- but not HB-EGF-induced  $\beta$ -cell proliferation suggest that this

phenomenon is also operative in  $\beta$  cells. Consistent with this possibility, short-term exposure of MIN6 and human islets to glucose leads to phosphorylation of the Src family kinase YES (48). Overall, our data are consistent with the model proposed in Fig. 7 whereby glucose promotes Src-dependent proHB-EGF processing leading to HB-EGF shedding and stimulation of  $\beta$ -cell proliferation via paracrine/autocrine signaling through the EGFR.

mTOR is an essential mediator of mitogen induced  $\beta$ -cell proliferation (49). Blocking mTOR activity prevents the mitogenic effects of glucose (28) and, as we showed in the present study, also mitigates HB-EGF-induced proliferation. Surprisingly however, blocking HB-EGF had no effect on the increase in mTOR activity in response to glucose yet HB-EGF inhibition completely prevented glucose-induced  $\beta$ -cell proliferation. Hence, we postulate the existence of a parallel signal emanating from EGFR acting alongside the mTOR pathway that is necessary for  $\beta$ -cell cycle engagement. A number of signaling effectors are known to act downstream of EGFR including, MAPK, PI3K/AKT and IRS2 (50) that could contribute to the mitogenic response to HB-EGF (Fig. 7).

In conclusion, this study reveals a critical role of HB-EGF/EGFR signaling in glucose-induced  $\beta$ -cell proliferation in rat islets. Future studies will focus on further elucidating the underlying mechanism and assessing the importance of this pathway in human islets.

## ACKNOWLEDGMENTS

This study was supported by the National Institutes of Health (grant R01-DK-58096 to V.P. and R01-DK-108905 to D.K.S.) and the Canadian Institutes of Health Research (grant MOP 77686 to V.P.). H.M. was supported by a doctoral studentship from the Fonds de Recherche Québec - Santé. V.P. holds the Canada Research Chair in Diabetes and Pancreatic Beta Cell Function.

We thank A. Levert (CRCHUM) for technical assistance with isolated experiments.

H.M. and M.R.M. designed the experiments and acquired the data. H.M., M.R.M., D.K.S., J.G. and V.P. researched data, analyzed the results, and wrote the manuscript. All authors revised the manuscript and approved the final version. V.P. is the guarantor of this work and, as such, takes full responsibility for the work.

The authors have no relevant conflict of interest to disclose.

Parts of this study were presented at the 77<sup>th</sup> Scientific Sessions of the American Diabetes association, San Diego, CA, 9-13 June 2017 and at the 79<sup>th</sup> Scientific Sessions of the American Diabetes association, San Francisco, CA, 7-11 June 2019.



## REFERENCES

1. Kahn SE: The importance of the beta-cell in the pathogenesis of type 2 diabetes mellitus. *Am J Med* 2000;108 Suppl 6a:2s-8s.
2. Dor Y, Brown J, Martinez OI, Melton DA: Adult pancreatic beta-cells are formed by self-duplication rather than stem-cell differentiation. *Nature* 2004;429:41-46.
3. Teta M, Rankin MM, Long SY, Stein GM, Kushner JA: Growth and regeneration of adult beta cells does not involve specialized progenitors. *Dev Cell* 2007;12:817-826.
4. Okada T, Liew CW, Hu J, Hinault C, Michael MD, Krtzfeldt J, Yin C, Holzenberger M, Stoffel M, Kulkarni RN: Insulin receptors in beta-cells are critical for islet compensatory growth response to insulin resistance. *Proc Natl Acad Sci U S A* 2007;104:8977-8982.
5. Kim H, Toyofuku Y, Lynn FC, Chak E, Uchida T, Mizukami H, Fujitani Y, Kawamori R, Miyatsuka T, Kosaka Y, Yang K, Honig G, van der Hart M, Kishimoto N, Wang J, Yagihashi S, Tecott LH, Watada H, German MS: Serotonin regulates pancreatic beta cell mass during pregnancy. *Nat Med* 2010;16:804-808.
6. Hakonen E, Ustinov J, Mathijs I, Palgi J, Bouwens L, Miettinen PJ, Otonkoski T: Epidermal growth factor (EGF)-receptor signalling is needed for murine beta cell mass expansion in response to high-fat diet and pregnancy but not after pancreatic duct ligation. *Diabetologia* 2011;54:1735-1743.
7. El Ouaamari A, Dirice E, Gedeon N, Hu J, Zhou JY, Shirakawa J, Hou L, Goodman J, Karampelias C, Qiang G, Boucher J, Martinez R, Gritsenko MA, De Jesus DF, Kahraman S, Bhatt S, Smith RD, Beer HD, Jungtrakoon P, Gong Y, Goldfine AB, Liew CW, Doria A, Andersson O, Qian WJ, Remold-O'Donnell E, Kulkarni RN: SerpinB1 Promotes Pancreatic beta Cell Proliferation. *Cell Metab* 2016;23:194-205.
8. Moulle VS, Vivot K, Tremblay C, Zarrouki B, Ghislain J, Poitout V: Glucose and fatty acids synergistically and reversibly promote beta cell proliferation in rats. *Diabetologia* 2017;60:879-888.
9. Alonso LC, Yokoe T, Zhang P, Scott DK, Kim SK, O'Donnell CP, Garcia-Ocana A: Glucose infusion in mice: a new model to induce beta-cell replication. *Diabetes* 2007;56:1792-1801.
10. Terauchi Y, Takamoto I, Kubota N, Matsui J, Suzuki R, Komeda K, Hara A, Toyoda Y, Miwa I, Aizawa S, Tsutsumi S, Tsubamoto Y, Hashimoto S, Eto K, Nakamura A, Noda M, Tobe K, Aburatani H, Nagai R, Kadowaki T: Glucokinase and IRS-2 are required for compensatory beta cell hyperplasia in response to high-fat diet-induced insulin resistance. *J Clin Invest* 2007;117:246-257.
11. Porat S, Weinberg-Corem N, Tornovsky-Babaey S, Schyr-Ben-Haroush R, Hija A, Stolovich-Rain M, Dadon D, Granot Z, Ben-Hur V, White P, Girard CA, Karni R, Kaestner KH, Ashcroft FM, Magnuson MA, Saada A, Grimsby J, Glaser B, Dor Y: Control of pancreatic beta cell regeneration by glucose metabolism. *Cell Metab* 2011;13:440-449.
12. Stamateris RE, Sharma RB, Hollern DA, Alonso LC: Adaptive beta-cell proliferation increases early in high-fat feeding in mice, concurrent with metabolic changes, with induction of islet cyclin D2 expression. *Am J Physiol Endocrinol Metab* 2013;305:E149-159.
13. Levitt HE, Cyphert TJ, Pascoe JL, Hollern DA, Abraham N, Lundell RJ, Rosa T, Romano LC, Zou B, O'Donnell CP, Stewart AF, Garcia-Ocana A, Alonso LC: Glucose stimulates human beta cell replication in vivo in islets transplanted into NOD-severe combined immunodeficiency (SCID) mice. *Diabetologia* 2011;54:572-582.

14. Metukuri MR, Zhang P, Basantani MK, Chin C, Stamateris RE, Alonso LC, Takane KK, Gramignoli R, Strom SC, O'Doherty RM, Stewart AF, Vasavada RC, Garcia-Ocana A, Scott DK: ChREBP mediates glucose-stimulated pancreatic beta-cell proliferation. *Diabetes* 2012;61:2004-2015.
15. Zhang P, Kumar A, Katz LS, Li L, Paulynice M, Herman MA, Scott DK: Induction of the ChREBPbeta Isoform Is Essential for Glucose-Stimulated beta-Cell Proliferation. *Diabetes* 2015;64:4158-4170.
16. Stoeckman AK, Ma L, Towle HC: Mlx is the functional heteromeric partner of the carbohydrate response element-binding protein in glucose regulation of lipogenic enzyme genes. *J Biol Chem* 2004;279:15662-15669.
17. Fontes G, Zarrouki B, Hagman DK, Latour MG, Semache M, Roskens V, Moore PC, Prentki M, Rhodes CJ, Jetton TL, Poitout V: Glucolipotoxicity age-dependently impairs beta cell function in rats despite a marked increase in beta cell mass. *Diabetologia* 2010;53:2369-2379.
18. Zarrouki B, Benterki I, Fontes G, Peyot ML, Seda O, Prentki M, Poitout V: Epidermal growth factor receptor signaling promotes pancreatic beta-cell proliferation in response to nutrient excess in rats through mTOR and FOXM1. *Diabetes* 2014;63:982-993.
19. Song Z, Fusco J, Zimmerman R, Fischbach S, Chen C, Ricks DM, Prasad K, Shiota C, Xiao X, Gittes GK: Epidermal Growth Factor Receptor Signaling Regulates beta Cell Proliferation in Adult Mice. *J Biol Chem* 2016;291:22630-22637.
20. Taylor SR, Markesbery MG, Harding PA: Heparin-binding epidermal growth factor-like growth factor (HB-EGF) and proteolytic processing by a disintegrin and metalloproteinases (ADAM): a regulator of several pathways. *Semin Cell Dev Biol* 2014;28:22-30.
21. Kelp CL, Johnson LM, Poitout V: Increasing triglyceride synthesis inhibits glucose-induced insulin secretion in isolated rat islets of langerhans: a study using adenoviral expression of diacylglycerol acyltransferase. *Endocrinology* 2002;143:3326-3332.
22. Ferdaoussi M, Bergeron V, Zarrouki B, Kolic J, Cantley J, Fielitz J, Olson EN, Prentki M, Biden T, MacDonald PE, Poitout V: G protein-coupled receptor (GPR)40-dependent potentiation of insulin secretion in mouse islets is mediated by protein kinase D1. *Diabetologia* 2012;55:2682-2692.
23. Hagman DK, Latour MG, Chakrabarti SK, Fontes G, Amyot J, Tremblay C, Semache M, Lausier JA, Roskens V, Mirmira RG, Jetton TL, Poitout V: Cyclical and alternating infusions of glucose and intralipid in rats inhibit insulin gene expression and Pdx-1 binding in islets. *Diabetes* 2008;57:424-431.
24. Ghislain J, Fontes G, Tremblay C, Kebede MA, Poitout V: Dual-Reporter beta-Cell-Specific Male Transgenic Rats for the Analysis of beta-Cell Functional Mass and Enrichment by Flow Cytometry. *Endocrinology* 2016;157:1299-1306.
25. Schmidt SF, Madsen JG, Frafjord KO, Poulsen L, Salo S, Boergesen M, Loft A, Larsen BD, Madsen MS, Holst JJ, Maechler P, Dalgaard LT, Mandrup S: Integrative Genomics Outlines a Biphasic Glucose Response and a ChREBP-RORgamma Axis Regulating Proliferation in beta Cells. *Cell Rep* 2016;16:2359-2372.
26. Hagege H, Klous P, Braem C, Splinter E, Dekker J, Cathala G, de Laat W, Forne T: Quantitative analysis of chromosome conformation capture assays (3C-qPCR). *Nat Protoc* 2007;2:1722-1733.
27. Taniguchi K, Xia L, Goldberg HJ, Lee KW, Shah A, Stavar L, Masson EA, Momen A, Shikatani EA, John R, Husain M, Fantus IG: Inhibition of Src kinase blocks high glucose-induced

EGFR transactivation and collagen synthesis in mesangial cells and prevents diabetic nephropathy in mice. *Diabetes* 2013;62:3874-3886.

28. Stamateris RE, Sharma RB, Kong Y, Ebrahimpour P, Panday D, Ranganath P, Zou B, Levitt H, Parambil NA, O'Donnell CP, Garcia-Ocana A, Alonso LC: Glucose Induces Mouse beta-Cell Proliferation via IRS2, MTOR, and Cyclin D2 but Not the Insulin Receptor. *Diabetes* 2016;65:981-995.

29. Kozawa J, Tokui Y, Moriwaki M, Li M, Ohmoto H, Yuan M, Zhang J, Iwahashi H, Imagawa A, Yamagata K, Tochino Y, Shimomura I, Higashiyama S, Miyagawa J: Regenerative and therapeutic effects of heparin-binding epidermal growth factor-like growth factor on diabetes by gene transduction through retrograde pancreatic duct injection of adenovirus vector. *Pancreas* 2005;31:32-42.

30. Means AL, Ray KC, Singh AB, Washington MK, Whitehead RH, Harris RC, Jr., Wright CV, Coffey RJ, Jr., Leach SD: Overexpression of heparin-binding EGF-like growth factor in mouse pancreas results in fibrosis and epithelial metaplasia. *Gastroenterology* 2003;124:1020-1036.

31. Tokui Y, Kozawa J, Yamagata K, Zhang J, Ohmoto H, Tochino Y, Okita K, Iwahashi H, Namba M, Shimomura I, Miyagawa J: Neogenesis and proliferation of beta-cells induced by human betacellulin gene transduction via retrograde pancreatic duct injection of an adenovirus vector. *Biochem Biophys Res Commun* 2006;350:987-993.

32. Rescan C, Le Bras S, Lefebvre VH, Frandsen U, Klein T, Foschi M, Pipeleers DG, Scharfmann R, Madsen OD, Heimberg H: EGF-induced proliferation of adult human pancreatic duct cells is mediated by the MEK/ERK cascade. *Lab Invest* 2005;85:65-74.

33. Suarez-Pinzon WL, Lakey JR, Brand SJ, Rabinovitch A: Combination therapy with epidermal growth factor and gastrin induces neogenesis of human islet {beta}-cells from pancreatic duct cells and an increase in functional {beta}-cell mass. *J Clin Endocrinol Metab* 2005;90:3401-3409.

34. Castillo GM, Nishimoto-Ashfield A, Banerjee AA, Landolfi JA, Lyubimov AV, Bolotin EM: Omeprazole and PGC-formulated heparin binding epidermal growth factor normalizes fasting blood glucose and suppresses insulinitis in multiple low dose streptozotocin diabetes model. *Pharm Res* 2013;30:2843-2854.

35. Elenius K, Paul S, Allison G, Sun J, Klagsbrun M: Activation of HER4 by heparin-binding EGF-like growth factor stimulates chemotaxis but not proliferation. *Embo j* 1997;16:1268-1278.

36. DiGruccio MR, Mawla AM, Donaldson CJ, Noguchi GM, Vaughan J, Cowing-Zitron C, van der Meulen T, Huising MO: Comprehensive alpha, beta and delta cell transcriptomes reveal that ghrelin selectively activates delta cells and promotes somatostatin release from pancreatic islets. *Mol Metab* 2016;5:449-458.

37. Hakonen E, Ustinov J, Palgi J, Miettinen PJ, Otonkoski T: EGFR signaling promotes beta-cell proliferation and survivin expression during pregnancy. *PLoS One* 2014;9:e93651.

38. Buteau J, Foisy S, Joly E, Prentki M: Glucagon-like peptide 1 induces pancreatic beta-cell proliferation via transactivation of the epidermal growth factor receptor. *Diabetes* 2003;52:124-132.

39. Huotari MA, Palgi J, Otonkoski T: Growth factor-mediated proliferation and differentiation of insulin-producing INS-1 and RINm5F cells: identification of betacellulin as a novel beta-cell mitogen. *Endocrinology* 1998;139:1494-1499.

40. Li L, Seno M, Yamada H, Kojima I: Promotion of beta-cell regeneration by betacellulin in ninety percent-pancreatectomized rats. *Endocrinology* 2001;142:5379-5385.

41. Kuntz E, Broca C, Komurasaki T, Kaltenbacher MC, Gross R, Pinget M, Damge C: Effect of epiregulin on pancreatic beta cell growth and insulin secretion. *Growth Factors* 2005;23:285-293.

42. Krakowski ML, Kritzik MR, Jones EM, Krah T, Lee J, Arnush M, Gu D, Mroczkowski B, Sarvetnick N: Transgenic expression of epidermal growth factor and keratinocyte growth factor in beta-cells results in substantial morphological changes. *J Endocrinol* 1999;162:167-175.
43. Huotari MA, Miettinen PJ, Palgi J, Koivisto T, Ustinov J, Harari D, Yarden Y, Otonkoski T: ErbB signaling regulates lineage determination of developing pancreatic islet cells in embryonic organ culture. *Endocrinology* 2002;143:4437-4446.
44. Li M, Miyagawa J, Moriwaki M, Yuan M, Yang Q, Kozawa J, Yamamoto K, Imagawa A, Iwahashi H, Tochino Y, Yamagata K, Matsuzawa Y: Analysis of expression profiles of islet-associated transcription and growth factors during beta-cell neogenesis from duct cells in partially duct-ligated mice. *Pancreas* 2003;27:345-355.
45. Tu Z, Keller MP, Zhang C, Rabaglia ME, Greenawalt DM, Yang X, Wang IM, Dai H, Bruss MD, Lum PY, Zhou YP, Kemp DM, Kendzierski C, Yandell BS, Attie AD, Schadt EE, Zhu J: Integrative analysis of a cross-loci regulation network identifies App as a gene regulating insulin secretion from pancreatic islets. *PLoS Genet* 2012;8:e1003107.
46. Bensellam M, Van Lommel L, Overbergh L, Schuit FC, Jonas JC: Cluster analysis of rat pancreatic islet gene mRNA levels after culture in low-, intermediate- and high-glucose concentrations. *Diabetologia* 2009;52:463-476.
47. Ray KC, Blaine SA, Washington MK, Braun AH, Singh AB, Harris RC, Harding PA, Coffey RJ, Means AL: Transmembrane and soluble isoforms of heparin-binding epidermal growth factor-like growth factor regulate distinct processes in the pancreas. *Gastroenterology* 2009;137:1785-1794.
48. Yoder SM, Dineen SL, Wang Z, Thurmond DC: YES, a Src family kinase, is a proximal glucose-specific activator of cell division cycle control protein 42 (Cdc42) in pancreatic islet beta cells. *J Biol Chem* 2014;289:11476-11487.
49. Balcazar N, Sathiyamurthy A, Elghazi L, Gould A, Weiss A, Shiojima I, Walsh K, Bernal-Mizrachi E: mTORC1 activation regulates beta-cell mass and proliferation by modulation of cyclin D2 synthesis and stability. *J Biol Chem* 2009;284:7832-7842.
50. Bernal-Mizrachi E, Kulkarni RN, Scott DK, Mauvais-Jarvis F, Stewart AF, Garcia-Ocana A: Human beta-cell proliferation and intracellular signaling part 2: still driving in the dark without a road map. *Diabetes* 2014;63:819-831.

## FIGURE LEGENDS

**Figure 1. HB-EGF stimulates  $\beta$ -cell proliferation via the EGFR.** (A-F) Isolated rat islets were exposed to 2.8 or 16.7 mM glucose or to HB-EGF (100 ng/ml) or betacellulin (BTC; 50 ng/ml) in the presence of 2.8 mM glucose for 72 h. (G, H) Isolated rat islets were exposed to 2.8 mM glucose and left untreated or treated with HB-EGF (100 ng/ml) with or without AG1478 (300 nM) or rapamycin (Rap; 10 nM) for 72 h. Proliferation was assessed by Ki67 (A-D, G, H) or EdU (E, F) staining and Nkx6.1 (A, B) or insulin (INS) (C-H) to mark  $\beta$  cells. Representative images of Nkx6.1 (red), Ki67 (green) and nuclei (blue) (A) or insulin (green), Ki67 or EdU (red) and nuclei (blue) (C, E, G) staining. Arrows show positive nuclei for Ki67 and EdU. (B, D, H) The percentage of Ki67<sup>+</sup> insulin<sup>+</sup> (or Nkx6.1<sup>+</sup>) cells of total insulin<sup>+</sup> (or Nkx6.1<sup>+</sup>) cells. (F) Percentage of EdU<sup>+</sup> insulin<sup>+</sup> cells of total insulin<sup>+</sup> cells. Data represent individual values and are expressed as mean  $\pm$  SEM (n=4–6). Scale bars, 50  $\mu$ m. \*p < 0.05, \*\*p<0.01, \*\*\*p<0.001, as compared to the 2.8 mM glucose control condition. ns, not significant.

**Figure 2. Glucose stimulates  $\beta$ -cell proliferation via HB-EGF/EGFR signaling.** (A-D) Isolated rat islets were exposed to 2.8 or 16.7 mM glucose with or without AG1478 (300 nM) (A, B) and 2.8 or 16.7 mM glucose or HB-EGF (100 ng/ml) in the presence of 2.8 mM glucose with or without CRM197 (10 mg/ml) (C, D) for 72 h. (E, F) Isolated rat islets were infected with Adv-shHBEGF or Adv-shCTL and exposed to 2.8 or 16.7 mM glucose for 72 h. Proliferation was assessed by Ki67 staining and insulin (INS) staining to mark  $\beta$ -cells. (A, C, E) Representative images of insulin (green), Ki67 (red) and nuclei (blue) staining. Arrows show positive nuclei for Ki67. (B, D, F) The percentage of Ki67<sup>+</sup> insulin<sup>+</sup> cells of total insulin<sup>+</sup> cells. Data represent individual values and means  $\pm$  SEM (n=4–6). Scale bars, 50  $\mu$ m. \*\*p<0.01, \*\*\*p<0.001, \*\*\*\*p<0.0001, as compared to the 2.8 mM glucose condition. ns, not significant.

**Figure 3. HB-EGF is required for glucose-induced  $\beta$ -cell proliferation *in vivo*.** (A) Isolated rat islets were infected with Adv-shHBEGF or Adv-shCTL and transplanted under the kidney capsule of two-month-old Lewis rats infused with saline (Sal) or glucose (Glu) for 72 h. (B-E) Proliferation was assessed by Ki67 staining and insulin (INS) staining to mark  $\beta$ -cells. (B, D) Representative images of insulin (green), Ki67 (red) and nuclei (blue) staining in the pancreas (B) or transplanted islets (D). Arrows show positive nuclei for Ki67. (C, E) The percentage of Ki67<sup>+</sup> insulin<sup>+</sup> cells of total insulin<sup>+</sup> cells in the pancreas (C) and transplanted islets (E). Data represent individual values and means  $\pm$  SEM (n=4–6). Scale bars, 50  $\mu$ m. \*\*\*p<0.001, \*\*\*\*p<0.0001, as compared to the saline condition. ns, not significant.

**Figure 4. Glucose increases HB-EGF gene expression in the  $\beta$ -cell.** (A-C) HB-EGF mRNA was measured in isolated intact rat islets (A) or in FACS-sorted YFP-positive (B) and YFP-negative (C) cells from isolated RIP7-RLuc-YFP islets following exposed to 2.8 or 16.7 mM glucose for 24 h. mRNA was determined by quantitative RT-PCR and normalized to cyclophilin A. Data are presented as the fold-increase over the 2.8 mM glucose condition and represent individual values and means  $\pm$  SEM (n=5-6). \*p < 0.05, as compared to the 2.8 mM glucose condition. ns, not significant.

**Figure 5. ChREBP mediates glucose-induced HB-EGF gene expression in INS-1 cells.** (A) HB-EGF RNA was measured in INS-1 cells exposed to 3 or 15 mM glucose for 18 h in the presence of a control siRNA (SiCon) or an siRNA directed against ChREBP (SiChR) (n=3). mRNA was determined by quantitative RT-PCR and normalized to  $\beta$ -actin. NT, non transfected. (B) ChREBP binding to a genomic region 30 kb downstream from the transcription start site of the HB-EGF gene known to bind ChREBP (black bar in C, upper) was assessed in INS-1 cells exposed to 2 or 20 mM glucose for 6 h followed by ChIP using an antibody against ChREBP or control IgG (n=3).



Data indicate the percent binding after subtraction of the IgG control. Inset, Pklr coding region serves as a negative control. (C) Upper, genome browser view of 38,000 bp of the genomic locus spanning the TSS of the HB-EGF gene showing the ChREBP binding (ChREBP ChIP) and DNase hypersensitivity sites (DNase HS) downstream of the gene (25). Black bar, region amplified in (B). Lower, chromatin confirmation capture (3C) data from INS-1 cells treated as in (B), aligned to the genome browser and expressed as interaction frequency normalized to maximum interaction (n=3). Black line, anchor primer. Shaded gray added for clarity represents interaction frequency after 20 mM glucose treatment. Data are expressed as mean  $\pm$  SEM. \* $p < 0.05$ , \*\*\* $p < 0.001$ , as compared to the control condition. ns, not significant.

**Figure 6. Src is required for glucose- but not HB-EGF-induced  $\beta$ -cell proliferation and glucose-induced mTOR activation does not require HB-EGF.** (A, B) Isolated rat islets were exposed to 2.8 or 16.7 mM glucose or HB-EGF (100 ng/ml) in the presence of 2.8 mM glucose for 72 h with or without the Src inhibitor PP1 (1  $\mu$ M). Proliferation was assessed by Ki67 staining and insulin (INS) to mark  $\beta$ -cells. (A) Representative images of insulin (green), Ki67 (red) and nuclei (blue). Arrows show positive nuclei for Ki67. (B) The percentage of Ki67<sup>+</sup> insulin<sup>+</sup> cells of total insulin<sup>+</sup> cells. Scale bars, 50  $\mu$ m. (C, D) Isolated rat islets were exposed to 2.8 or 16.7 mM glucose or HB-EGF (100 ng/ml) in the presence of 2.8 mM glucose with or without CRM197 (10 mg/ml) for 24 and 48 h. Representative Western blot (C) of phospho-S6RP (pS6RP) and  $\alpha$ -tubulin and densitometric quantification (D) of pS6RP normalized to  $\alpha$ -tubulin. Data represent individual values and means  $\pm$  SEM (n=4-6). \* $p < 0.05$ , \*\* $p < 0.01$ , \*\*\* $p < 0.001$ , as compared to the 2.8 mM glucose condition or as indicated in the graph (B). ns, not significant.

**Figure 7. Proposed mechanism of glucose/HB-EGF/EGFR axis controlling  $\beta$ -cell proliferation.** An increase in the soluble, active form of HB-EGF is mediated by glucose-induced

ChREBP, which increases HB-EGF gene expression, and by glucose-induced Src, which is coupled to metalloprotease (ADAM)-dependent proHB-EGF processing. Subsequent binding of HB-EGF to the  $\beta$ -cell EGFR activates signaling pathways including mTOR but also possibly MAPK, PI3K/AKT and IRS2 that together promote  $\beta$ -cell proliferation. Specific inhibitors used in this study to block glucose- and HB-EGF-induced  $\beta$ -cell proliferation are indicated.



# Figure 1

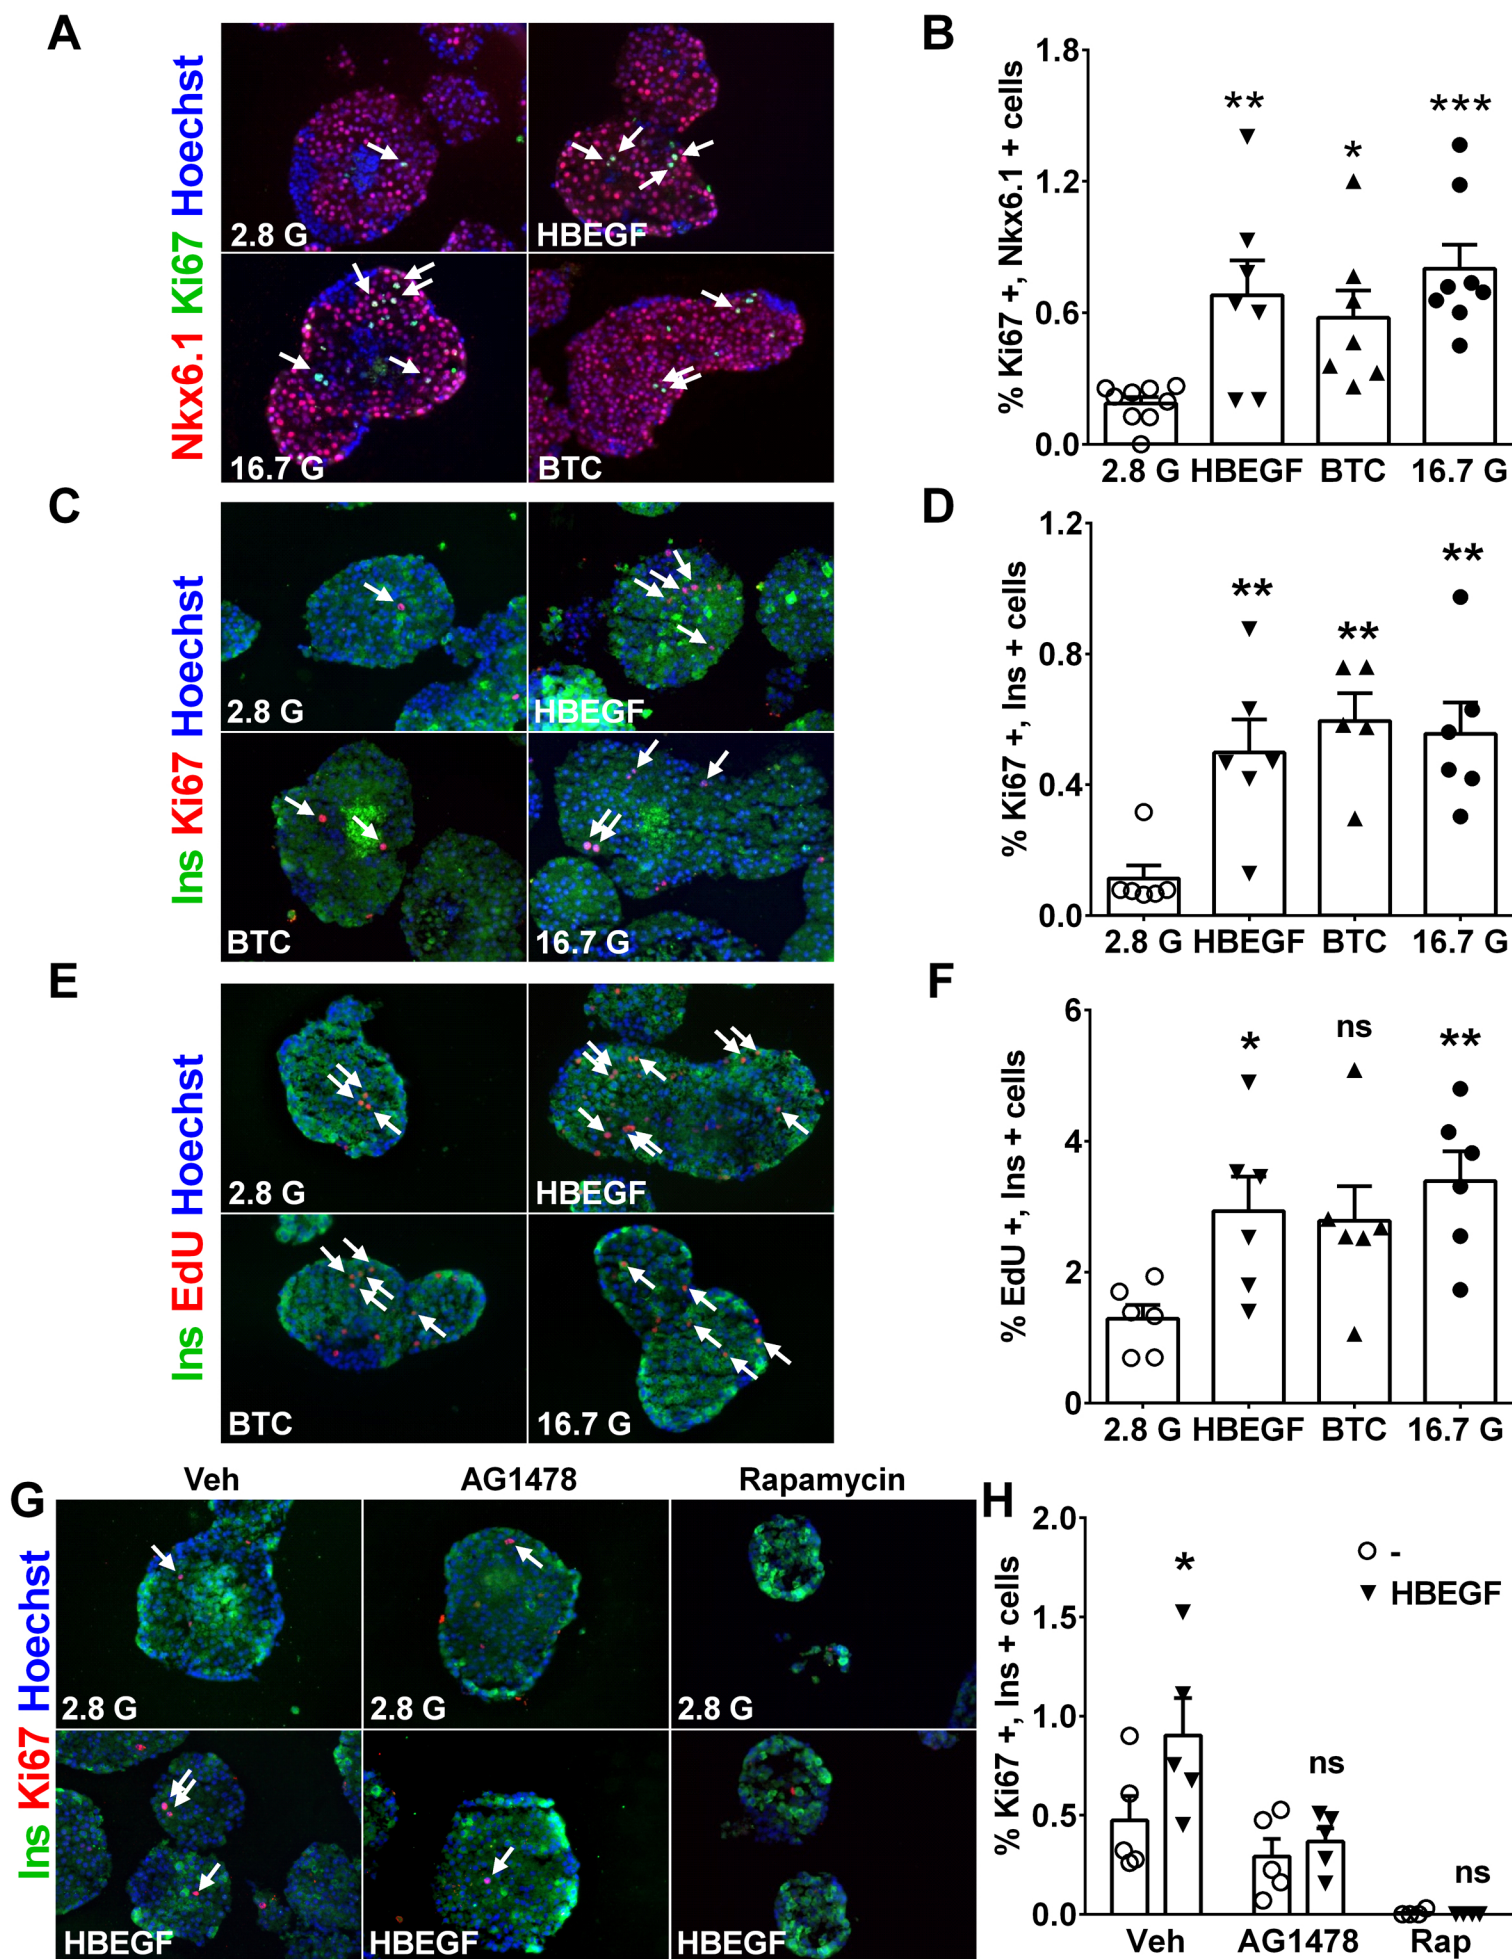

## Figure 2

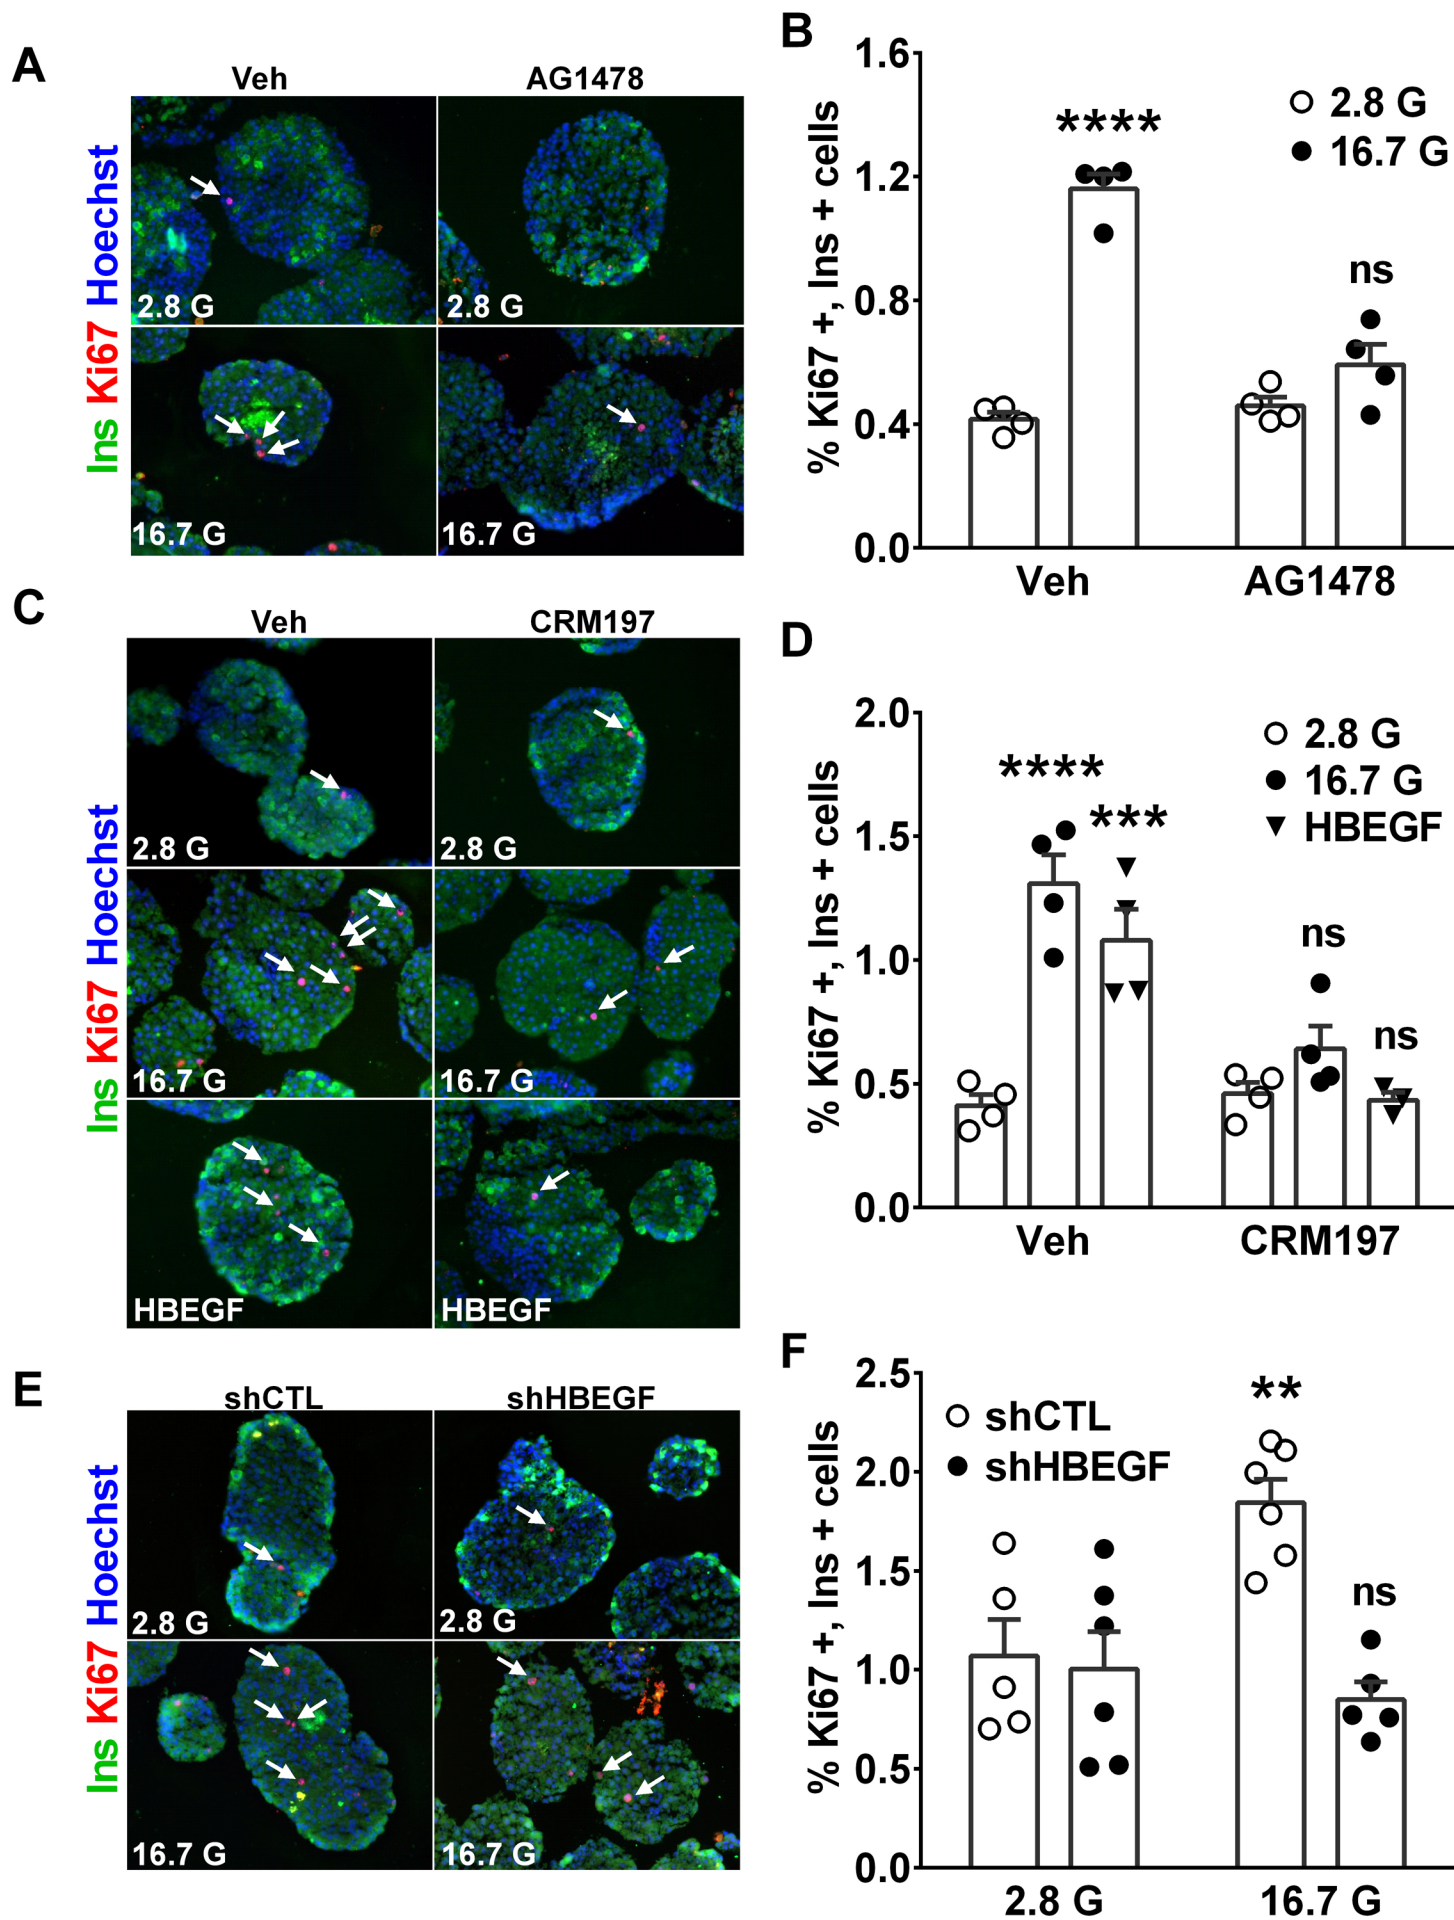



## Figure 3

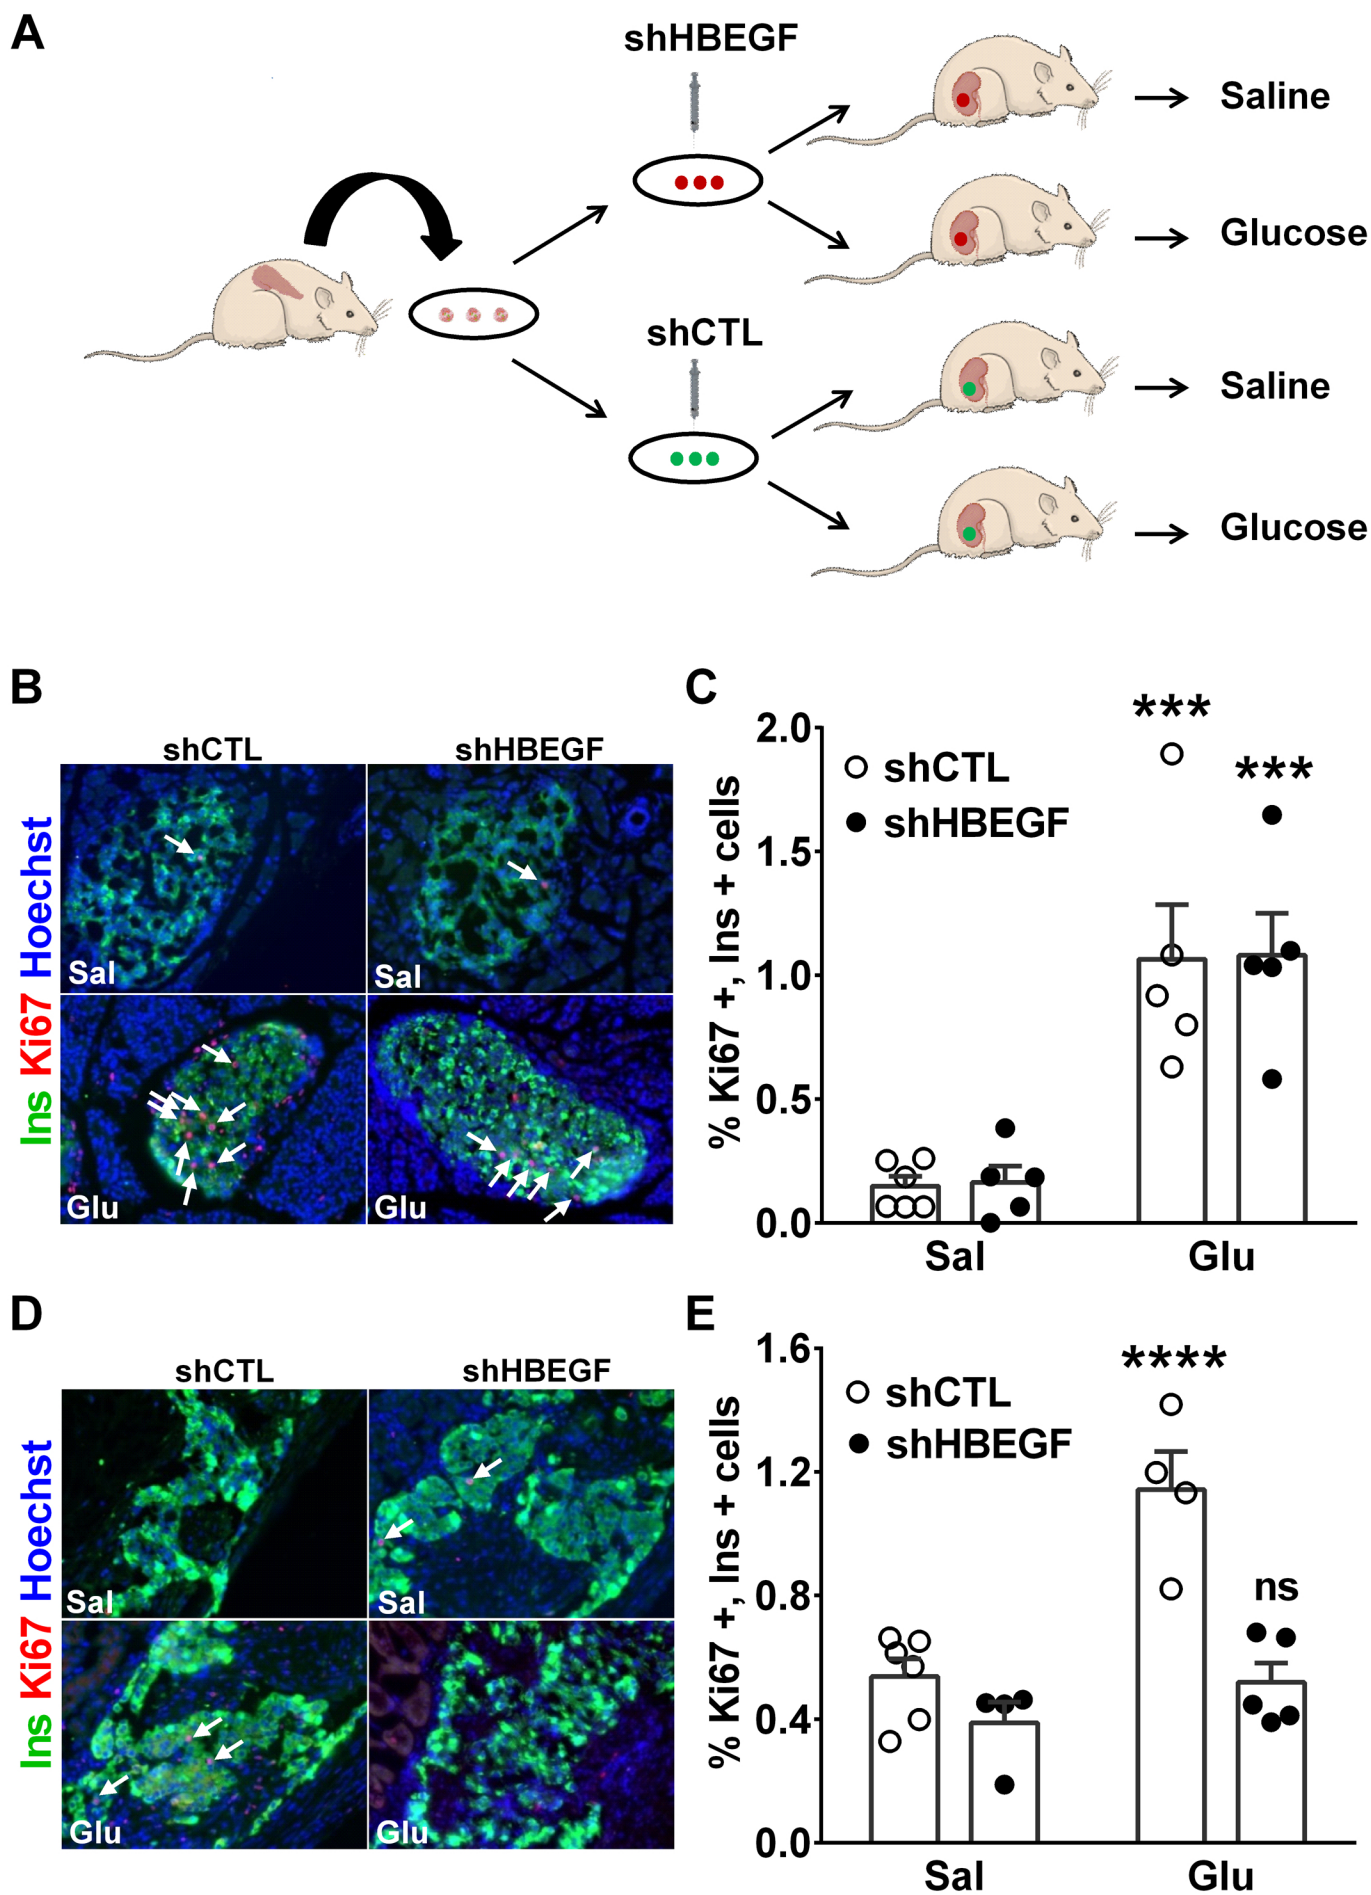

**Figure 4**

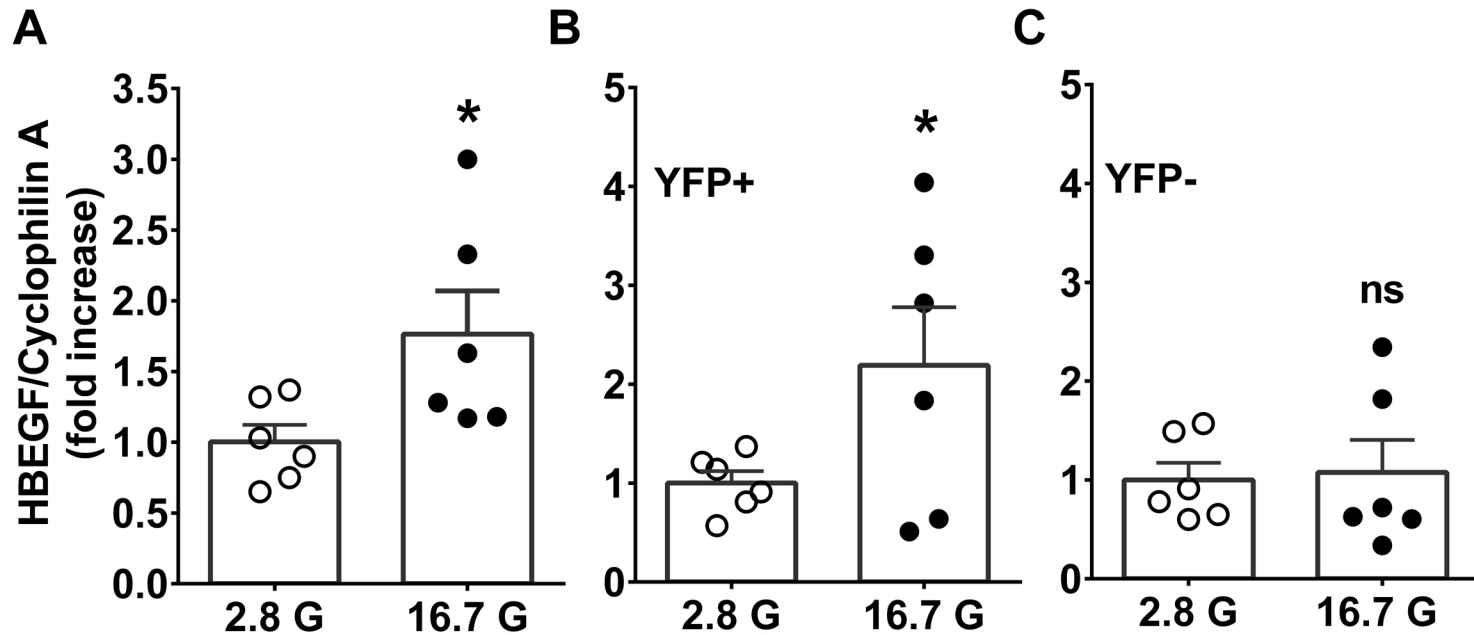

# Figure 5

bioRxiv preprint doi: <https://doi.org/10.1101/683003>; this version posted June 27, 2019. The copyright holder for this preprint (which was not certified by peer review) is the author/funder, who has granted bioRxiv a license to display the preprint in perpetuity. It is made available under aCC-BY-NC-ND 4.0 International license.

**A**

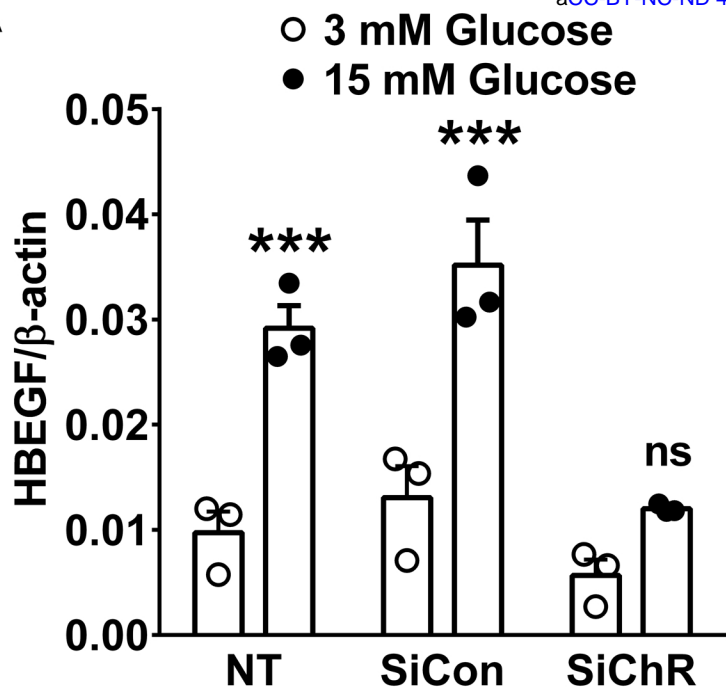

**B**

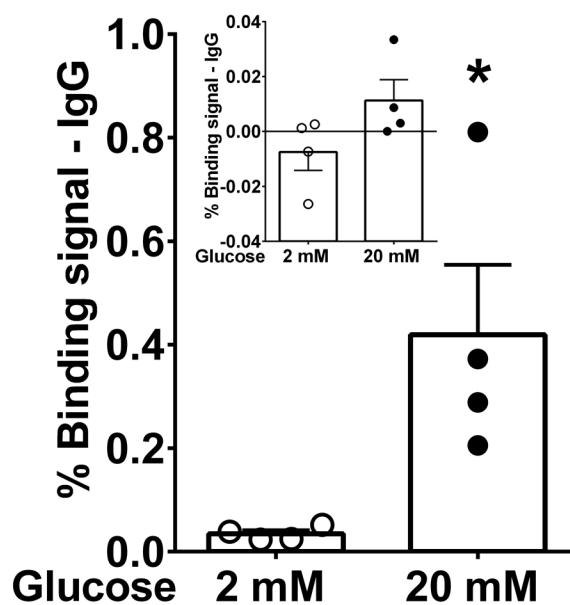

**C**

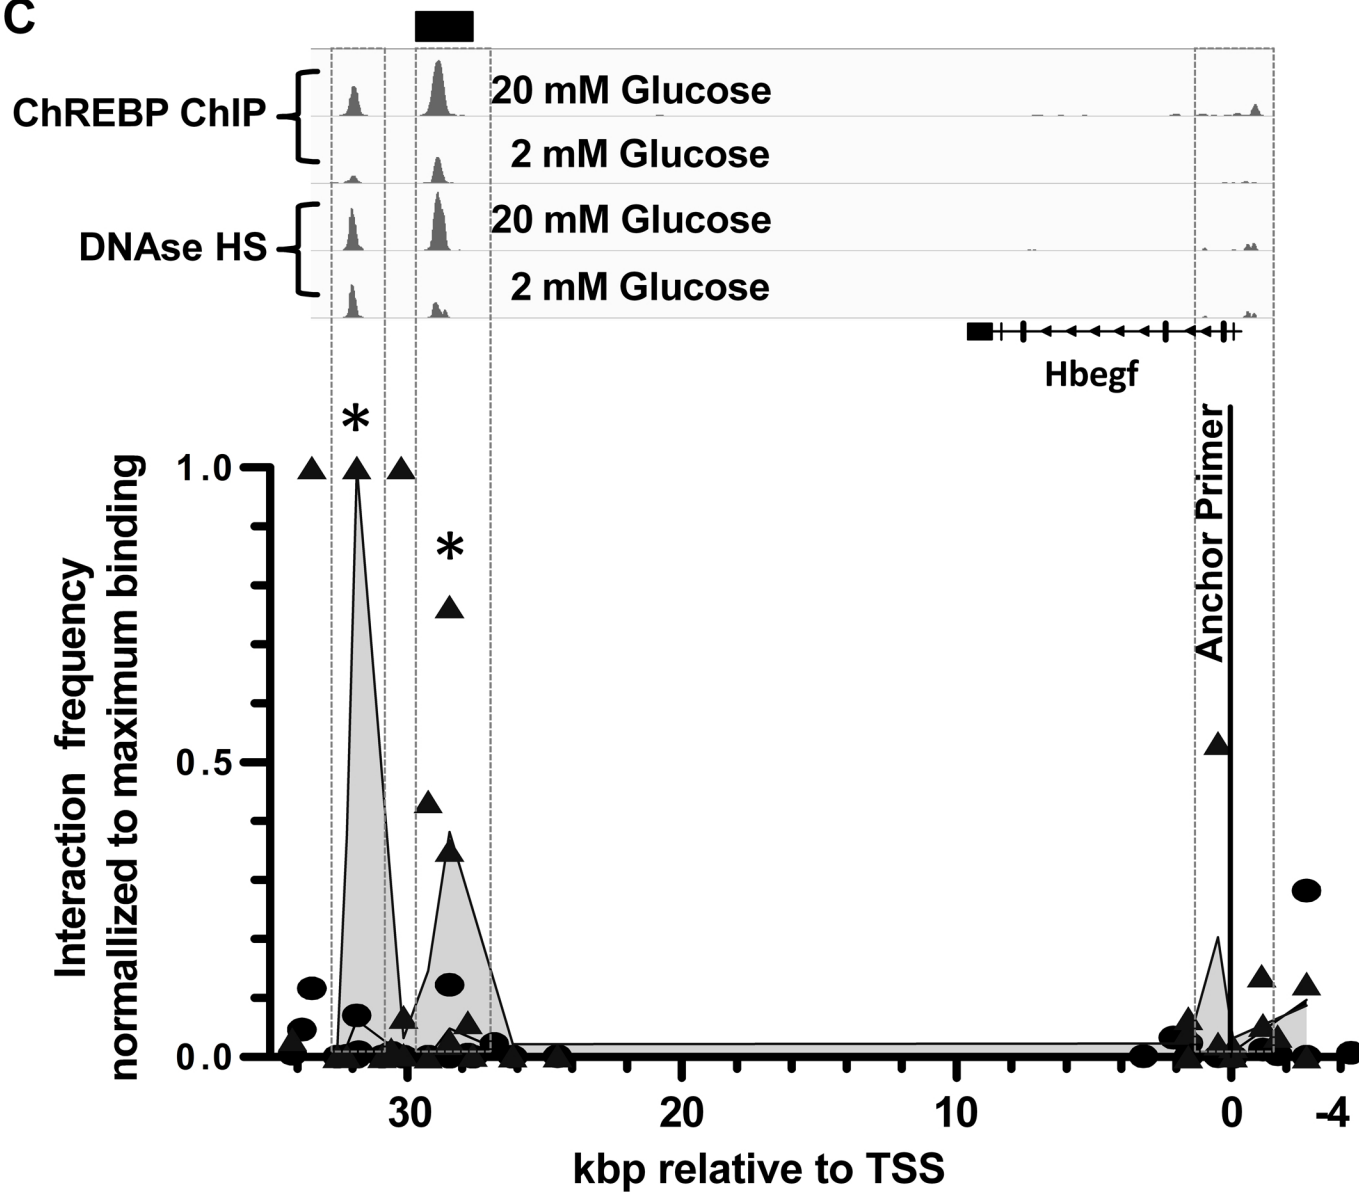

**Figure 6**

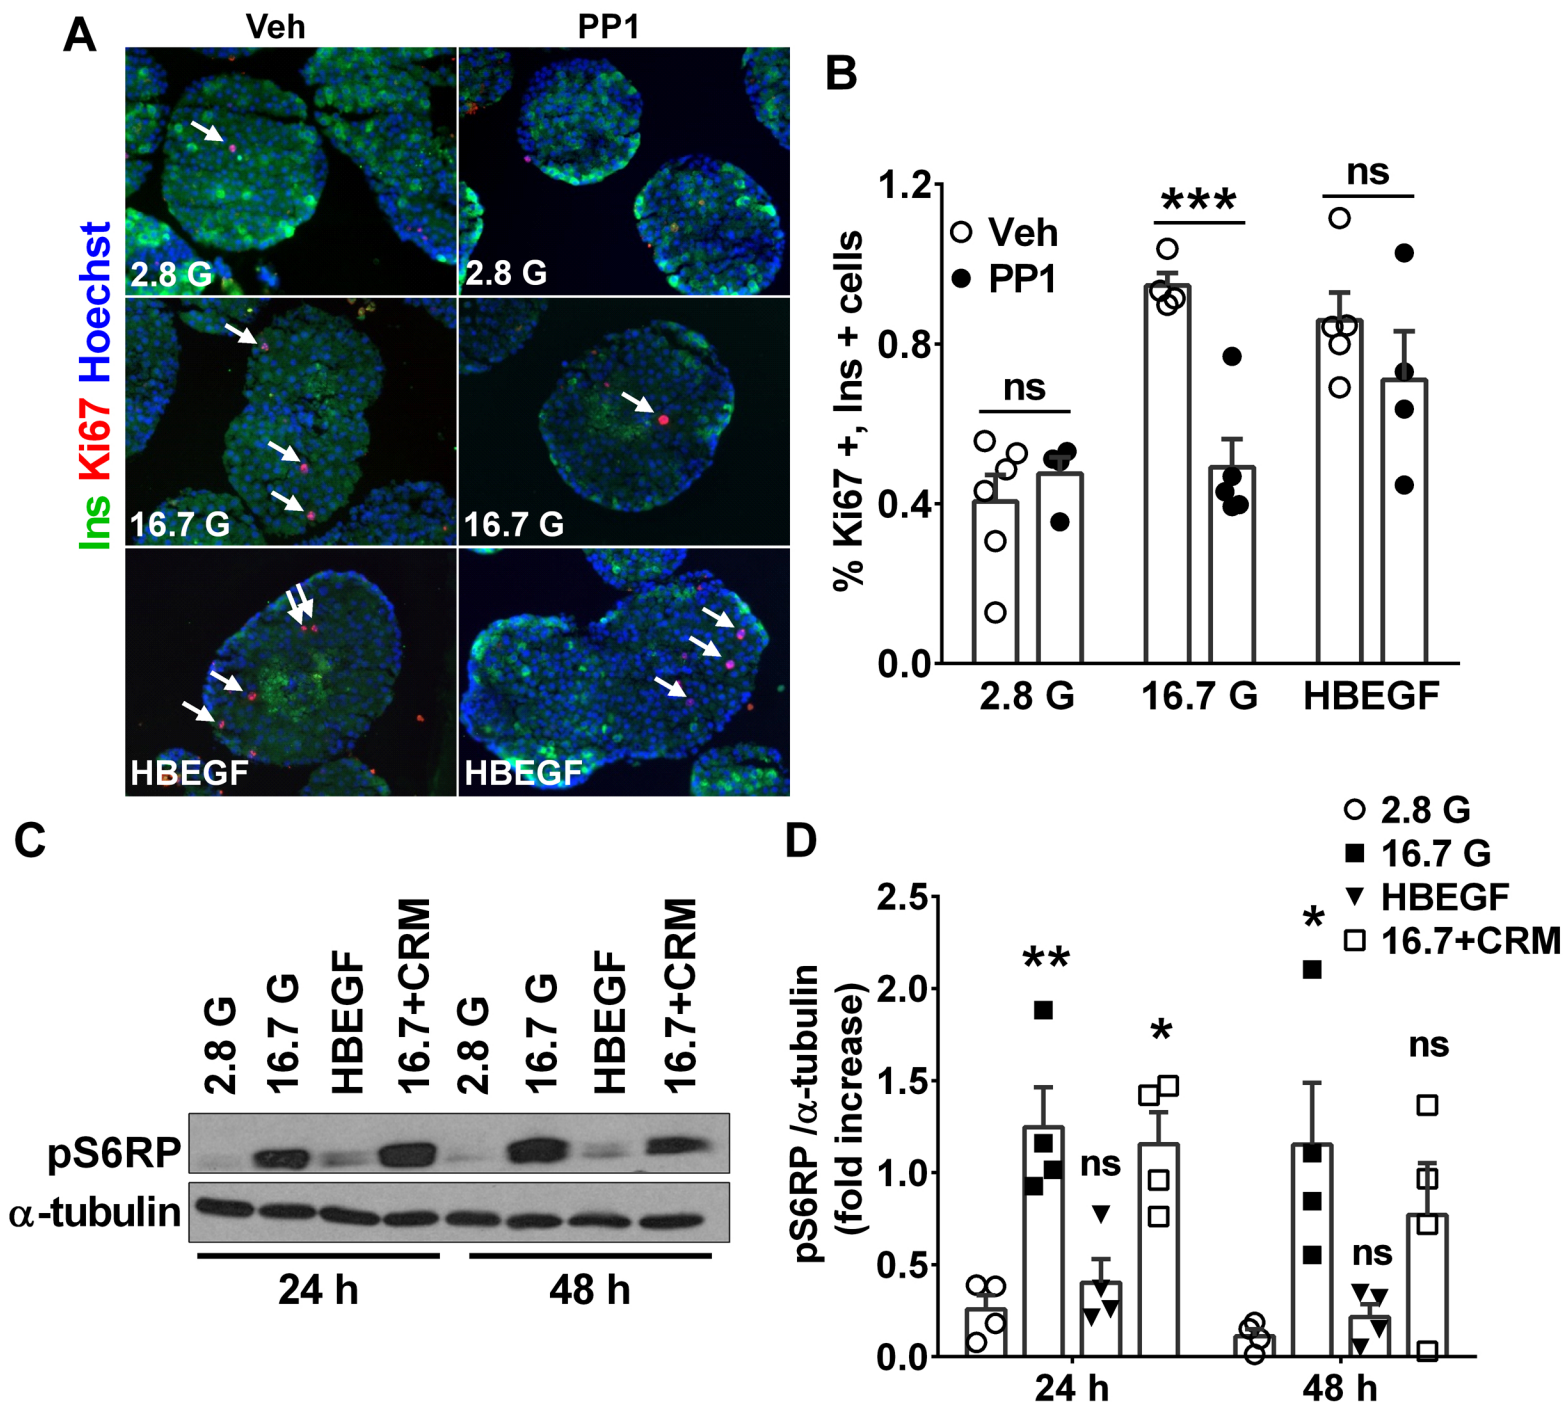

Figure 7

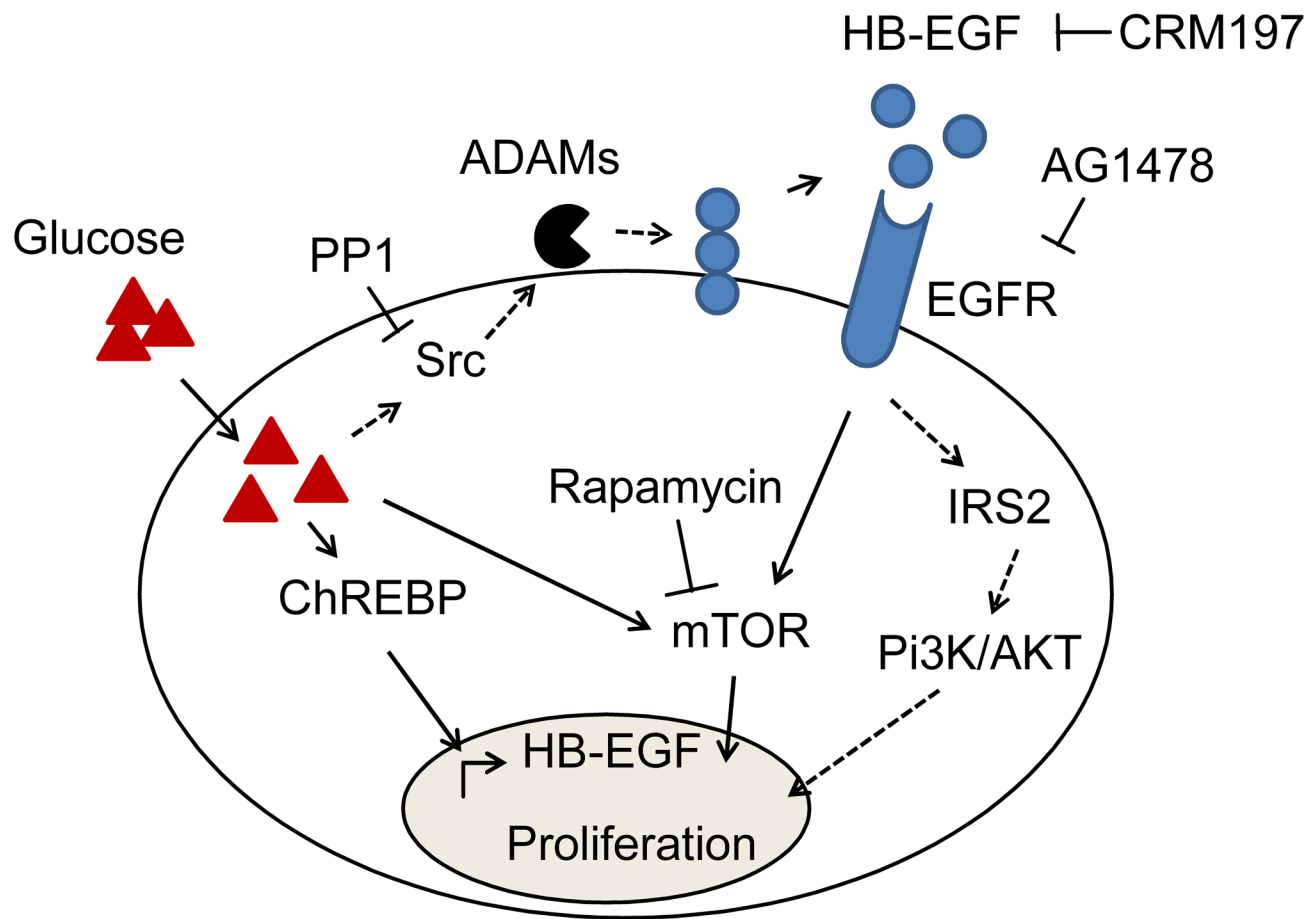

Source: https://www.biorxiv.org/content/10.1101/683003v1.full.pdf
